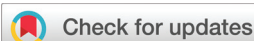

Cite this: *Toxicol. Res.*, 2017, **6**, 755

## The ABCs of pesticide toxicology: amounts, biology, and chemistry

John E. Casida  <sup>\*a</sup> and Robert J. Bryant  <sup>\*b</sup>

Received 17th July 2017,  
Accepted 14th August 2017  
DOI: 10.1039/c7tx00198c  
[rsc.li/toxicology-research](http://rsc.li/toxicology-research)

Everyone is affected directly or indirectly by pesticide use and safety. The magnitude and perception of this effect depend on one's individual involvement or vantage point. The researcher seeks discovery and the entrepreneur goes after financial rewards. The general public wants food, health and safety. Pesticide toxicology is a core issue in these relationships. The three goals of toxicology research on pesticides are first to create new knowledge and chemicals, second to evaluate their effectiveness and safety and third to regulate their use. What amounts of pesticides are applied and do we really understand their biology and chemistry? This review addresses the ABCs of pesticide toxicology, *i.e.* their amounts, biology and chemistry.

### 1. Introduction

We live in a competitive environment with many species of pest insects (10 000), weeds (1800) and fungi (80 000) yet we survive and sometimes prosper by maintaining the balance in favor of people and their food supply. Pesticides are designed

to control pests with minimal effects on people and the environment. This takes many millions of pounds of pesticide chemicals and constant updating of the pesticide arsenal to keep up with the development of resistant pest strains. The goal of this review is to briefly evaluate the current status of pesticide toxicology research which involves determining their mode of action, resistance mechanisms, secondary effects in mammalian systems, and environmental impact. It involves a different emphasis than recent reviews by the author<sup>1–5</sup> by focusing on amounts, biology and chemistry, the ABCs of pesticide toxicology (Fig. 1).

<sup>a</sup>Environmental Chemistry and Toxicology Laboratory, Department of Environmental Science, Policy, and Management, University of California, Berkeley 94720, USA. E-mail: [ectl@berkeley.edu](mailto:ectl@berkeley.edu)

<sup>b</sup>Agranova, Orpington, Kent BR6 9AP, UK. E-mail: [rob@agranova.co.uk](mailto:rob@agranova.co.uk)

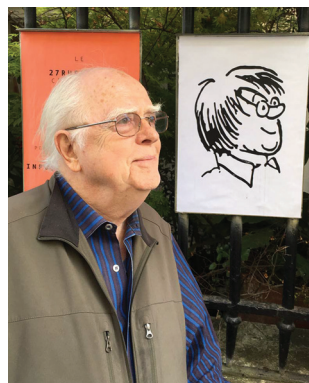

John E. Casida

John E. Casida is Professor of Toxicology and Entomology at the University of California, Berkeley, since 1964. He received his Ph.D. degree in 1954 from the University of Wisconsin, Madison, in Entomology, Biochemistry, and Plant Physiology and was Professor there from 1954–1964. He is a member of the U.S. National Academy of Sciences, the European Academy of Sciences, the Royal Society of the United

Kingdom (foreign member), and a Wolf Prize Laureate in agriculture. He is author/co-author of more than 800 publications with over 200 Ph.D. students, postdoctoral fellows, and visiting scientists.

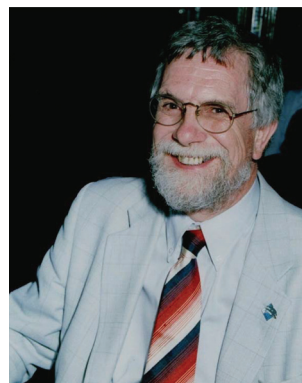

Robert J. Bryant

Robert J. Bryant is a chemist and specialist business consultant, with 28 years' experience in advising companies that produce or use fine chemicals. He studied Natural Sciences at Peterhouse, Cambridge, where he obtained his MA and PhD. He founded Brychem in 1992 and has since carried out confidential studies for over 250 clients operating within the pharmaceutical, agrochemical, food ingredients and the flavour and fragrance industries.

In 1997 he acquired the US publisher, Ag Chem Information Services, and re-launched the company as Agranova, providing reports and online databases to a worldwide customer base, Agranova is a leading provider of technical and commercial information to the global crop protection industry.

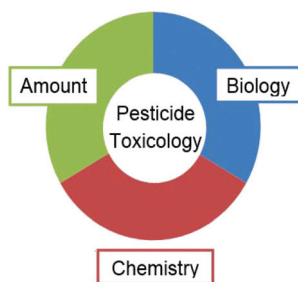

Fig. 1 The ABCs of pesticide toxicology.

## 2. Approach and data sources

This review relates the amounts, biology and chemistry of the top 30 pesticides, insecticides, herbicides and fungicides to their molecular targets and chemotypes. The data for amounts on a worldwide basis are ranked by volume in metric tons (m/t, one m/t is 2204.62 lbs) but sales values (dollars, millions) are also given for comparison using 2015 data.<sup>6</sup> The ranking by amounts favors high volume inexpensive compounds and by dollars emphasizes high value chemicals. The biological portion states the primary mechanisms of pesticidal action and the common modes of action with increased likelihood of cross-resistance assigned by the Resistance Action Committees for insecticides (IRAC),<sup>7</sup> herbicides (HRAC),<sup>8</sup> and fungicides (FRAC).<sup>9</sup> The toxicology and hazard ratings for acute toxicity and long-term effects in mammals and the environment

(pollinators, aqueous organisms, and bioaccumulation) are based on the 2016 compilations of the Pesticide Action Network (PAN) international list of most hazardous pesticides.<sup>10</sup> PAN states their goals as to “challenge the global proliferation of pesticides, defend basic rights to health and environmental quality, and work to ensure the transition to a just and viable food supply”. Judgements from this international citizens’ action network must be balanced against those of toxicologists and chemists in appropriate regulatory agencies. Extensive evaluations are made by the Environmental Protection Agency (EPA) in the Federal Register and in a variety of reviews (e.g. ref. 11) and position statements by registration agencies of many countries and regions. The chemistry aspects relate to chemical types (chemotypes) for each type of pesticidal activity and comments on bioaccumulation, persistence and special features. The goal is to highlight the impact of the pesticides of current importance more than historical significance. Structures of four or five major compounds in amount of each type are shown in Fig. 2. Structures of the other compounds considered are given in The Pesticide Manual.<sup>12</sup>

## 3. Pesticides

The worldwide use of the top 30 pesticides based on 2015 data for amounts was about 2 million mt (4 billion pounds) divided between insecticides (5.7%), herbicides (55.4%), fungicides (28.6%) and others (10.3%). The overall corresponding values

### A. Insecticides

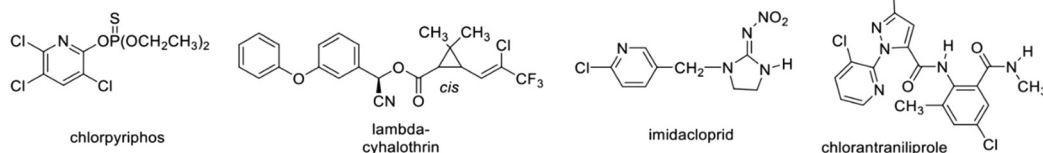

### B. Herbicides

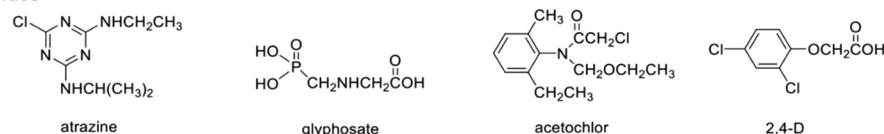

### C. Fungicides

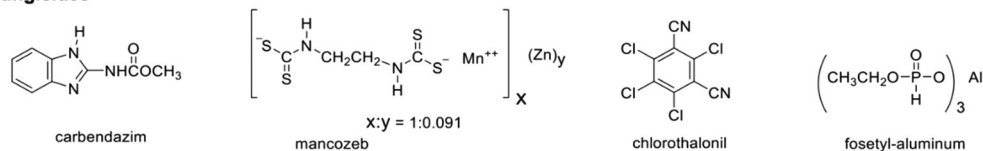

### D. Nematicides, Molluscicide

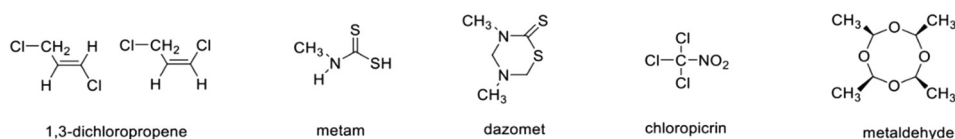

Fig. 2 Structures of the top four insecticides (A), herbicides (B), and fungicides (C), and top five nematocides/molluscicide (D) in 2015 annual amounts.

**Table 1** Relative importance of the pesticide types as the 2015 amounts and sales

| Pesticide type      | Annual millions |               | Percent of total |       |
|---------------------|-----------------|---------------|------------------|-------|
|                     | Amount (m/t)    | Sales (\$ mn) | Amount           | Sales |
| Insecticides        | 114 100         | 2515          | 5.7              | 14.7  |
| Herbicides          | 1 111 900       | 10 305        | 55.4             | 60.2  |
| Fungicides          | 573 450         | 3189          | 28.6             | 18.6  |
| Others <sup>a</sup> | 206 815         | 1118          | 10.3             | 6.5   |
| Total               | 2 006 265       | 17 127        | 100.0            | 100.0 |

<sup>a</sup> 1,3-Dichloropropene, metam, chloropicrin, dazomet and metaldehyde.

based on sales were 14.7%, 60.2%, 18.6% and 6.5% respectively (Table 1, Fig. 3A). The amounts and sales favor herbicides followed by fungicides and insecticides. Volume and sales in 2015 were dominated by the herbicide glyphosate with 715 000 m/t or 1.6 billion lbs and sales of 5.56 billion dollars. The newer compounds are generally more potent and expensive so even a few years difference often changes the balance in pesticide amounts and sales.

## 4. Insecticides

### Amounts

More than half (16/30) of the top volume insecticides are organophosphates (OPs) or methylcarbamates (MCs) accounting for 59.6% of the total insecticides by amount but 17.2% by sales (Table 2, Fig. 3B), indicating that their cost per pound is less than that of other insecticides. Thus chlorpyrifos is the number one synthetic insecticide by volume (40.8%) but only 2.2% by sales. The pyrethroids (pyrs) account for 5.6% by volume and 12.5% by sales. The four top volume nicotinic acetylcholine receptor (nAChR) agonists total only 12.0% by volume but 43.1% by sales. Other major insecticides by volume are 4 synthetics; the bacteria-derived *Bacillus thuringiensis* (Bt) and an inorganic (cryolite). The more expensive pyrs, neonicotinoids (neonics) and other insecticides reflect their structural complexity and newer status.

### Biology

The OPs (IRAC 1B) and MCs (IRAC 1A) as acetylcholinesterase (AChE) inhibitors are limited in effectiveness by cross-resistance in many pest species. Some of the OPs and MCs have high mammalian acute toxicity and three (malathion, omethoate, and carbaryl) have observed long-term effects in

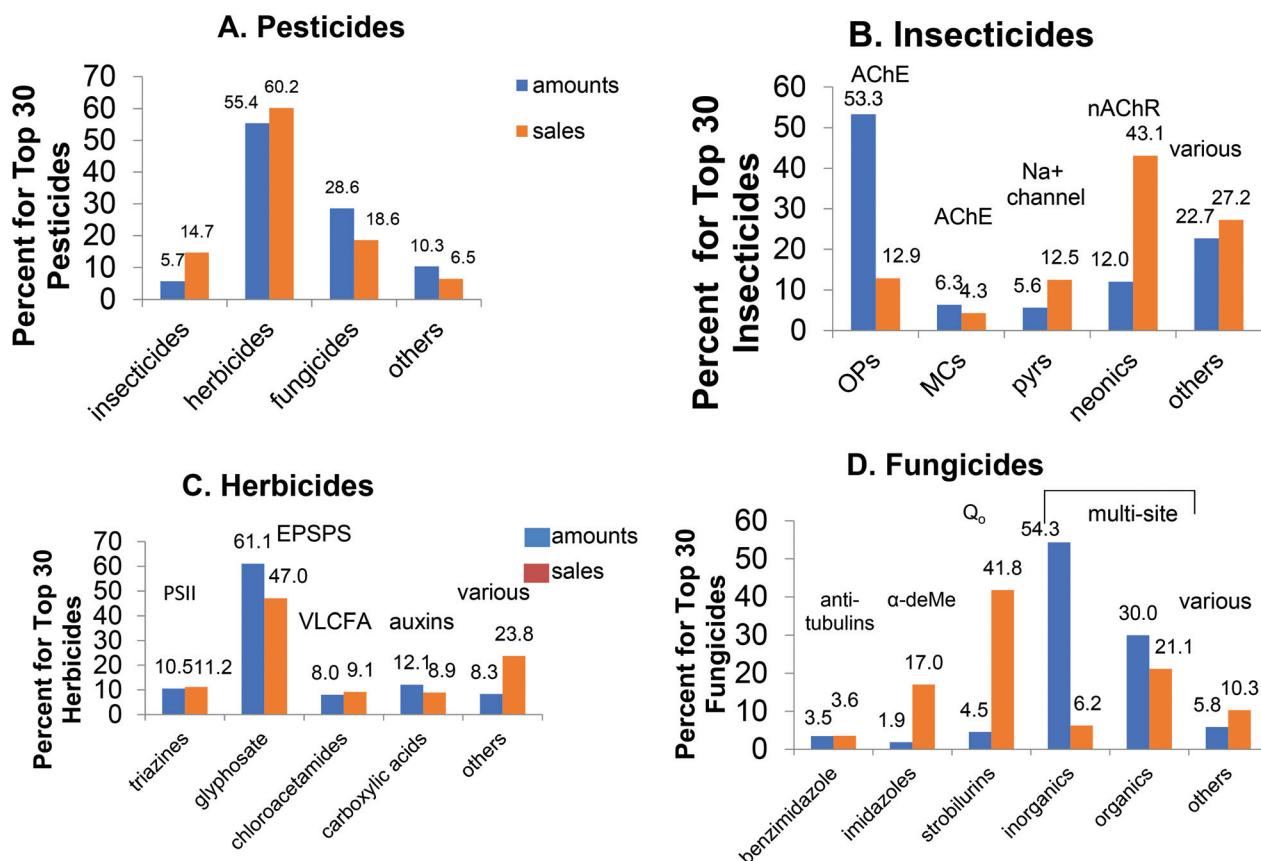

**Fig. 3** Major pesticides, insecticides, herbicides, and fungicides in 2015 annual amounts and sales. Panel A considers the top 30 pesticides in amounts and the corresponding sales data for this compound set. Panel B for insecticides, C for herbicides, and D for fungicides are each based on the top 30 compounds of the type in amounts and sales in each case indicating the molecular targets and chemotypes. In Panel C, others include three categories (superoxide-bipyridylium, antitubulin-dinitroanilines, and various others) from Table 3 given later.

**Table 2** Thirty major insecticides and their molecular targets, chemotypes, IRAC classifications, 2015 annual amounts and sales and 2016 PAN international hazard ratings

| No. in top 30 insecticides <sup>a</sup>      | Name                          | Annual millions |               |             | Hazard ratings <sup>b</sup> |                          |
|----------------------------------------------|-------------------------------|-----------------|---------------|-------------|-----------------------------|--------------------------|
|                                              |                               | Amount (m/t)    | Sales (\$ mn) | IRAC class. | Mammal <sup>c</sup>         | Environment <sup>d</sup> |
| AChE – organophosphates (OPs)                |                               |                 |               |             |                             |                          |
| 1                                            | Chlorpyriphos                 | 46 500          | 543           | 1B          | 0/0                         | 1/0/0/0                  |
| 3                                            | Acephate                      | 14 000          | 120           | 1B          | 0/0                         | 1/0/0/0                  |
| 4                                            | Dimethoate                    | 11 600          | 95            | 1B          | 0/0                         | 1/0/0/0                  |
| 6                                            | Malathion                     | 8500            | 91            | 1B          | 0/1                         | 1/0/0/0                  |
| 9                                            | Phorate                       | 5200            | 42            | 1B          | 1/0                         | 1/0/0/0                  |
| 14                                           | Triazophos                    | 2425            | 21            | 1B          | 1/0                         | 0/0/0/0                  |
| 17                                           | Methamidophos                 | 2350            | 15            | 1B          | 1/0                         | 1/0/0/0                  |
| 18                                           | Terbufos                      | 2235            | 69            | 1B          | 1/0                         | 0/0/0/0                  |
| 19                                           | Chlorethoxyfos                | 2200            | 40            | 1B          | 1/0                         | 1/0/0/0                  |
| 21                                           | Profenofos                    | 2100            | 46            | 1B          | 0/0                         | 1/0/0/0                  |
| 25                                           | Fosthiazate                   | 2010            | 78            | 1B          | 0/0                         | 1/0/0/0                  |
| 28                                           | Omethoate                     | 2000            | 29            | 1B          | 1/1                         | 1/0/0/0                  |
| AChE – methylcarbamates (MCs)                |                               |                 |               |             |                             |                          |
| 7                                            | Carbofuran                    | 6200            | 215           | 1A          | 1/0                         | 1/0/0/0                  |
| 24                                           | Oxamyl                        | 2050            | 68            | 1A          | 1/0                         | 1/0/0/0                  |
| 27                                           | Carbaryl                      | 2000            | 46            | 1A          | 0/1                         | 1/0/0/0                  |
| 30                                           | Methomyl                      | 1775            | 67            | 1A          | 1/0                         | 1/0/0/0                  |
| Na <sup>+</sup> channel – pyrethroids (Pyrs) |                               |                 |               |             |                             |                          |
| 11                                           | Lambda-cyhalothrin            | 3500            | 605           | 3A          | 1/1                         | 1/0/0/0                  |
| 12                                           | Cypermethrin                  | 2825            | 187           | 3A          | 0/0                         | 1/0/0/0                  |
| 16                                           | Permethrin                    | 2360            | 310           | 3A          | 0/1                         | 1/0/0/0                  |
| 26                                           | Fenvalerate                   | 2000            | 53            | 3A          | 0/0                         | 1/0/0/0                  |
| nAChR – neonics                              |                               |                 |               |             |                             |                          |
| 5                                            | Imidacloprid                  | 10 000          | 1508          | 4A          | 0/0                         | 1/0/0/0                  |
| 8                                            | Acetamiprid                   | 5750            | 376           | 4A          | —                           | —                        |
| 10                                           | Thiamethoxam                  | 4650            | 1481          | 4A          | 0/0                         | 1/0/0/0                  |
| 15                                           | Clothianidin                  | 2400            | 612           | 4A          | 0/0                         | 1/0/0/0                  |
| Others <sup>e</sup>                          |                               |                 |               |             |                             |                          |
| 2                                            | <i>Bacillus thuringiensis</i> | 32 000          | 249           | 11A         | —                           | —                        |
| 13                                           | Chlorantraniliprole           | 2750            | 1260          | 28          | 0/0                         | 0/1/1/0                  |
| 20                                           | Fipronil                      | 2100            | 730           | 2B          | 0/0                         | 1/0/0/0                  |
| 22                                           | Cartap hydrochloride          | 2070            | 106           | 14          | —                           | —                        |
| 23                                           | Buprofezin                    | 2050            | 160           | 16          | —                           | —                        |
| 29                                           | Cryolite                      | 2000            | 6             | 8C          | —                           | —                        |

<sup>a</sup> Rankings 1–30 among the insecticides from most to least in annual amounts. <sup>b</sup> Ratings from PAN international list of highly hazardous pesticides (12/2016) as highly hazardous (1) or not (0). Blanks indicate not rated. <sup>c</sup> Acute toxicity/chronic or long term effects (carcinogen, mutagen and reproductive). <sup>d</sup> Sequentially bees/aqueous organisms/persistence/bioaccumulation. <sup>e</sup> Chemotypes: fipronil – phenylpyrazole; cryolite – inorganic; *Bacillus thuringiensis* – microbial; cartap hydrochloride – nereistoxin analogue; buprofezin – thiadiazinone; chlorantraniliprole – diamide.

mammals. They are readily biodegradable without major environmental problems other than bee toxicity. The pyrs, as voltage-dependent sodium channel activators (IRAC 3A), initiate hyperactivity alone (Type I) or followed by convulsions (Type II). Cross-resistance is a major problem at a site designated kdr. They are usually very toxic to fish and pollinators. Some pyrs have high mammalian acute and chronic toxicity (lambda-cyhalothrin) but few or no problems of persistence and bioaccumulation. The neonics acting at the nAChR have generally favorable mammalian toxicity. Neonics selectivity for insects *versus* mammals is due in part to differences in the insect and mammalian nAChR binding sites. The neonics are also prone to cross-resistance (IRAC 4A) but the greatest problem is toxicity to pollinators for thiamethoxam, imidacloprid, and clothianidin, which has led to restrictions or bans in many countries. Fipronil is the last remaining major chloride channel blocker with bee toxicity as a problem. The inorganic cryolite is an important component in pest management pro-

grams. Bt is present in large amounts in several genetically-modified organism (GMO) crops expressing this insecticide without major toxic problems for mammals or the environment. Cartap acts on the nicotinic receptors and buprofezin on chitin synthesis. The most rapidly growing area is the diamide channel activators<sup>13</sup> exemplified by chlorantraniliprole where mammalian toxicity is very low but some environmental organisms are very sensitive.

### Chemistry

The structural complexity of the different insecticide chemotypes is reflected in the cost per pound (sales/volume) increasing for OPs, MCs, neonics, pyrs and anthranilamides (chlorantraniliprole). They are all biodegradable by carboxylesterases, cytochrome P450s (CYPs) or glutathione (GSH) S-transferases (GSTs). Special aspects are the CYP-dependent oxidation/activation of the phosphorothionates and phosphorothiolates and the photodesulfinylation of fipronil as an activation process.

## 5. Herbicides

### Amounts

Herbicides dominate the pesticide market mainly because of glyphosate and its trimesium salt accounting for 61.1% of the worldwide volume and 47.0% of the top 30 herbicide sales in 2015 (Table 3, Fig. 3C). They are followed by phenoxyacetic acids (2,4-D and MCPA) and benzoic acids with 12.1% and 8.9% of total herbicide volume and sales, respectively. Other major chemotypes are the 1,3,5-triazines and chloroacetamides, then the bipyridiliums, followed by a great variety of structural types.

### Biology

Herbicides must be selective for weeds *versus* crops and systemic for effective control. Resistance is a major limiting factor

for every herbicide target. Photosystem II (PS II) inhibitors acting at three different sites [HRAC C1 (the Q<sub>o</sub> or plastoquinol binding site), C2 and C3] are among the most important herbicides with atrazine and propanil used in largest amounts in corn and rice, respectively. Mammalian toxicity problems are noted for atrazine, diuron, linuron and bromoxynil. The bipyridiliums paraquat and diquat, acting as superoxide generators, pose acute toxicity problems in mammals (despite relatively high values for LD<sub>50</sub>s) but few or no environmental problems because of rapid binding in soil. The most important herbicide target is 5-enolpyruvylshikimate-3-phosphate synthase (EPSPS), present in the aromatic amino acid biosynthesis pathway in plants but not mammals. The dominance of EPSPS results from the importance of glyphosate and GMOs resistant to glyphosate from expressed bacterial EPSPS of low sensitivity

**Table 3** Thirty major herbicides and their molecular targets, HRAC classifications, 2015 annual amounts and sales and 2016 PAN international hazard ratings

|                                                         |                      | Annual millions |               |             | Hazard ratings <sup>b</sup> |                          |
|---------------------------------------------------------|----------------------|-----------------|---------------|-------------|-----------------------------|--------------------------|
| No. in top 30 herbicides <sup>a</sup>                   | Name                 | Amount (m/t)    | Sales (\$ mn) | HRAC class. | Mammal <sup>c</sup>         | Environment <sup>d</sup> |
| <b>PS II – triazines, pyridazinone, phenylcarbamate</b> |                      |                 |               |             |                             |                          |
| 3                                                       | Atrazine             | 59 100          | 215           | C1          | 0/1                         | 0/0/0/0                  |
| 19                                                      | Phenmedipham         | 5450            | 251           | C1          | —                           | —                        |
| 23                                                      | Chloridazon          | 5000            | 225           | C1          | —                           | —                        |
| 25                                                      | Simazine             | 4400            | 49            | C1          | —                           | —                        |
| <b>PS II – anilide, ureas</b>                           |                      |                 |               |             |                             |                          |
| 8                                                       | Propanil             | 22 600          | 120           | C2          | —                           | —                        |
| 16                                                      | Isoproturon          | 7150            | 80            | C2          | —                           | —                        |
| 17                                                      | Diuron               | 6850            | 79            | C2          | 0/1                         | 0/0/0/0                  |
| 21                                                      | Linuron              | 5250            | 53            | C2          | 0/1                         | 0/0/0/0                  |
| 27                                                      | Tebuthiuron          | 3600            | 55            | C2          | —                           | —                        |
| <b>PS II – benzothiadiazinone, hydroxybenzonitrile</b>  |                      |                 |               |             |                             |                          |
| 26                                                      | Bentazone            | 4295            | 188           | C3          | —                           | —                        |
| 28                                                      | Bromoxynil           | 3300            | 142           | C3          | 1/0                         | 0/0/0/0                  |
| <b>Superoxide – bipyridylum</b>                         |                      |                 |               |             |                             |                          |
| 5                                                       | Paraquat-dichloride  | 38 250          | 710           | D           | 1/0                         | 0/0/0/0                  |
| 20                                                      | Diquat dibromide     | 5300            | 66            | D           | 1/0                         | 0/0/0/0                  |
| <b>EPSPS – glycine derivatives</b>                      |                      |                 |               |             |                             |                          |
| 1                                                       | Glyphosate           | 715 000         | 5560          | G           | 0/1                         | 0/0/0/0                  |
| 6                                                       | Glyphosate-trimesium | 25 000          | 565           | G           | —                           | —                        |
| <b>Antitubulin – dinitroanilines</b>                    |                      |                 |               |             |                             |                          |
| 11                                                      | Pendimethalin        | 16 800          | 253           | K1          | 0/0                         | 0/0/1/1                  |
| 13                                                      | Trifluralin          | 9250            | 101           | K1          | 0/1                         | 0/0/0/1                  |
| 29                                                      | Ethalfuralin         | 3000            | 47            | K1          | —                           | —                        |
| <b>VLCA – chloroacetamides</b>                          |                      |                 |               |             |                             |                          |
| 4                                                       | Acetochlor           | 57 550          | 486           | K3          | 0/1                         | 0/0/0/0                  |
| 7                                                       | S-metolachlor        | 24 500          | 516           | K3          | —                           | —                        |
| 14                                                      | Metolachlor          | 9100            | 123           | K3          | —                           | —                        |
| 18                                                      | Butachlor            | 5760            | 65            | K3          | 0/1                         | 0/0/0/0                  |
| <b>Auxin – carboxylic acids</b>                         |                      |                 |               |             |                             |                          |
| 2                                                       | 2,4-DB               | 106 000         | 556           | O           | 0/1                         | 0/0/0/0                  |
| 9                                                       | MCPA                 | 17 800          | 109           | O           | —                           | —                        |
| 10                                                      | Dicamba              | 17 550          | 345           | O           | —                           | —                        |
| 22                                                      | Triclopyr            | 5200            | 149           | O           | —                           | —                        |
| <b>Others<sup>e</sup></b>                               |                      |                 |               |             |                             |                          |
| 12                                                      | Mesotrione           | 11 750          | 870           | F2          | —                           | —                        |
| 24                                                      | Clomazone            | 4600            | 345           | F3          | —                           | —                        |
| 15                                                      | Glufosinate-ammonium | 8500            | 675           | H           | 0/1                         | 0/0/0/0                  |
| 30                                                      | EPTC                 | 3000            | 27            | N           | —                           | —                        |

<sup>a</sup> Rankings 1–30 among the herbicides from most to least in annual amounts. <sup>b</sup> Ratings from PAN international list of highly hazardous pesticides (12/2016) as highly hazardous (1) or not (0). Blanks indicate not rated. <sup>c</sup> Acute toxicity/chronic or long term effects (carcinogen, mutagen and reproductive). <sup>d</sup> Sequentially bees/aqueous organisms/persistence/bioaccumulation. <sup>e</sup> Chemotypes: mesotrione – triketone; clomazone – isoxazolidinone; glufosinate-ammonium – phosphinic acid; EPTC – thiocarbamate.



and expressed bacterial glyphosate oxidase to detoxify before toxic effects in maize. A major debate continues on classification of glyphosate as a probable human carcinogen. Glyphosate resistance in many weeds has resulted in increased dosages and even more questions on safety. The dinitroaniline antitubulins have some long-term toxicological effects in mammals and questions on persistence and bioaccumulation. The chloroacetamides acetochlor and its analogs block very long chain fatty acid (VLCFA) biosynthesis and generate reactive quinoneimine metabolites. The auxin-targeting carboxylic acids of the 2,4-D type continue as major compounds with carcinogenesis questions on 2,4-D. Herbicides in major amounts acting on other targets are mesotrione on 4-hydroxyphenylpyruvate dioxygenase (HPPD),

clomazone on carotenoid biosynthesis and glufosinate on glutamine synthetase and *N*-methyl-D-aspartate receptors with long-term mammalian toxicity effects for the latter compound. Herbicides lacking crop selectivity are sometimes safened by dichloroacetamides and other inducers of plant GSH and GST synthesis.

### Chemistry

Each chemotype has its own characteristic metabolic reactions, *e.g.* GST/weed-crop selectivity for triazines and toxic quinoneimine formation for chloroacetamides. The 2,3,7,8-tetrachlorodibenzodioxin highly toxic impurity in 2,4,5-T (triclopyr) manufacture is mostly removed to meet the high purity standards.

**Table 4** Thirty major fungicides and their molecular targets, FRAC classifications, 2015 annual amounts and sales and 2016 PAN international hazard ratings

|                                            |                    | Annual millions |               |             | Hazard ratings <sup>b</sup> |                          |
|--------------------------------------------|--------------------|-----------------|---------------|-------------|-----------------------------|--------------------------|
| No. in top 30 fungicides <sup>a</sup>      | Name               | Amount (m/t)    | Sales (\$ mn) | FRAC class. | Mammal <sup>c</sup>         | Environment <sup>d</sup> |
| Antitubulin – benzimidazole                |                    |                 |               |             |                             |                          |
| 6                                          | Carbendazim        | 16 750          | 158           | 1, B1, MBC  | 0/1                         | 0/0/0/0                  |
| 13                                         | Thiophanate-methyl | 6400            | 235           | 1, B1, MBC  | 0/1                         | 0/0/0/0                  |
| 14α-Demethylase – imidazoles and triazoles |                    |                 |               |             |                             |                          |
| 17                                         | Prochloraz         | 3510            | 106           | 3, G1       | —                           | —                        |
| 20                                         | Prothioconazole    | 3100            | 764           | 3, G1       | —                           | —                        |
| 22                                         | Epoxiconazole      | 2925            | 496           | 3, G1       | 0/1                         | 0/0/0/0                  |
| 23                                         | Tebuconazole       | 2900            | 517           | 3, G1       | —                           | —                        |
| Q <sub>o</sub> – strobilurin type          |                    |                 |               |             |                             |                          |
| 9                                          | Azoxystrobin       | 9350            | 1740          | 11, C3      | —                           | —                        |
| 11                                         | Pyraclostrobin     | 9000            | 1405          | 11, C3      | —                           | —                        |
| 14                                         | Trifloxystrobin    | 6225            | 1085          | 11, C3      | —                           | —                        |
| 18                                         | Famoxadone         | 3425            | 105           | 11, C3      | —                           | —                        |
| 29                                         | Kresoxim-methyl    | 2300            | 290           | 11, C3      | 0/1                         | 0/0/0/0                  |
| Multisites – inorganics                    |                    |                 |               |             |                             |                          |
| 1                                          | Sulphur            | 286 000         | 387           | M2          | —                           | —                        |
| 3                                          | Copper salts       | 74 000          | 295           | M1, M       | 1/0                         | 0/1/1/0                  |
| 21                                         | Bordeaux mixture   | 3000            | 7             | M1, M       | —                           | —                        |
| Multisites – dithiocarbamates              |                    |                 |               |             |                             |                          |
| 2                                          | Mancozeb           | 108 000         | 1185          | M3, M       | 0/1                         | 0/0/0/0                  |
| 8                                          | Maneb              | 11 400          | 38            | M3, M       | 0/1                         | 0/0/0/0                  |
| 12                                         | Propineb           | 6560            | 80            | M3, M       | —                           | —                        |
| 19                                         | Ziram              | 3400            | 26            | M3, M       | 1/0                         | 0/0/0/0                  |
| 30                                         | Metiram            | 2230            | 16            | M3, M       | 0/1                         | 0/0/0/0                  |
| Multisites – others <sup>e</sup>           |                    |                 |               |             |                             |                          |
| 4                                          | Chlorothalonil     | 43 500          | 800           | M5, M       | 1/1                         | 0/0/0/0                  |
| 7                                          | Captan             | 16 000          | 96            | M4, M       | —                           | —                        |
| 10                                         | Folpet             | 9250            | 98            | M4, M       | 0/1                         | 0/0/0/0                  |
| Others <sup>f</sup>                        |                    |                 |               |             |                             |                          |
| 5                                          | Fosetyl-aluminum   | 17 800          | 230           | 33, U       | —                           | —                        |
| 15                                         | Tricyclazole       | 4400            | 99            | 16.1, I1    | —                           | —                        |
| 16                                         | Iprodione          | 3775            | 132           | 2, E3       | 0/1                         | 0/0/0/0                  |
| 24                                         | Cymoxanil          | 2800            | 155           | 27, O       | —                           | —                        |
| 25                                         | Probenazole        | 2800            | 138           | P, P2       | —                           | —                        |
| 26                                         | Dimethomorph       | 2710            | 142           | 40, H5      | —                           | —                        |
| 27                                         | Pyrimethanil       | 2500            | 66            | 9, D1       | —                           | —                        |
| 28                                         | Metalaxyl          | 2340            | 177           | 4, A1       | —                           | —                        |

<sup>a</sup> Rankings 1–30 among the fungicides from most to least in annual amounts. <sup>b</sup> Ratings from PAN international list of highly hazardous pesticides (12/2016) as highly hazardous (1) or not (0). Blanks indicate not rated. <sup>c</sup> Acute toxicity/chronic or long term effects (carcinogen, mutagen and reproductive). <sup>d</sup> Sequentially bees/aqueous organisms/persistence/bioaccumulation. <sup>e</sup> Chemotypes: captan, folpet – phthalimide; chlorothalonil – chloronitrile. <sup>f</sup> Chemotypes: fosetyl-aluminum – phosphonate; tricyclazole – triazolobenzothiazole; iprodione – dicarboximide; cymoxanil – cyanoacetamide oxime; probenazole – benzoisothiazole, dimethomorph – cinnamic acid amide; pyrimethanil – anilinopyrimidine; metalaxyl – phenylamide or acylalanine.

## 6. Fungicides

### Amounts

The amounts and sales of fungicides fall between herbicides and insecticides with the highest proportionate use in Europe and the Far East (Fig. 3D). The multisite fungicides are largest in volume including the inorganics sulfur, the copper salts and Bordeaux mixture (Table 4). The dithiocarbamates and particularly mancozeb continue as major compounds with the thiol-reactive captan, folpet and chlorothalonil also used in large amounts. These multisite (multiple target site) fungicides are the least likely to undergo selection for resistance. A variety of specific molecular targets account for the rest of the top 30 fungicides in volume (Table 4).

### Biology

Fungicides are particularly known for their diversity of biochemical targets in order to minimize selection of resistant strains. There are three specific targets for major fungicides (Table 4, Fig. 3D). The benzimidazoles thiophanate-methyl and its activation product, carbendazim, are antitubulins effective on many types of fungi. The imidazole and triazole ergosterol biosynthesis inhibitors acting as 14 $\alpha$ -demethylase ( $\alpha$ -deMe) inhibitors are specific for a biochemical step not involved in cholesterol biosynthesis in mammals thereby conferring a high level of selectivity. The newer strobilurin-type Q<sub>o</sub>

inhibitors based on the mushroom-derived azoxystrobin are the highest in sales and used in large amounts but already with some loss in effectiveness from resistant strains. Fosetyl-aluminum is a phosphonic acid precursor effective on many fungal diseases without major resistance problems. Several fungicides have long-term effects in mammals and a few (copper salts, ziram, and chlorothalonil) have acute toxicity. Copper salts also have potential environmental problems.

### Chemistry

Diversity is the key to fungicide chemistry (Fig. 2 and 4). Reactivity is a second feature for the multisite fungicides. Residues are minimal because of this reactivity.

## 7. Others

Three nematicides (1,3-dichloropropene, metam and chloropicrin) are or yield volatile toxicants for soil fumigation (Fig. 2). Large amounts are used but at relatively low cost (Table 5). They are bioactivated by CYPs or GSTs. Metaldehyde is the most important molluscicide in this relatively small market. Rodenticides and still other pesticide types are not considered here although their action as vitamin K antagonists, anti-coagulants, and at other targets has contributed greatly to toxicology in general.

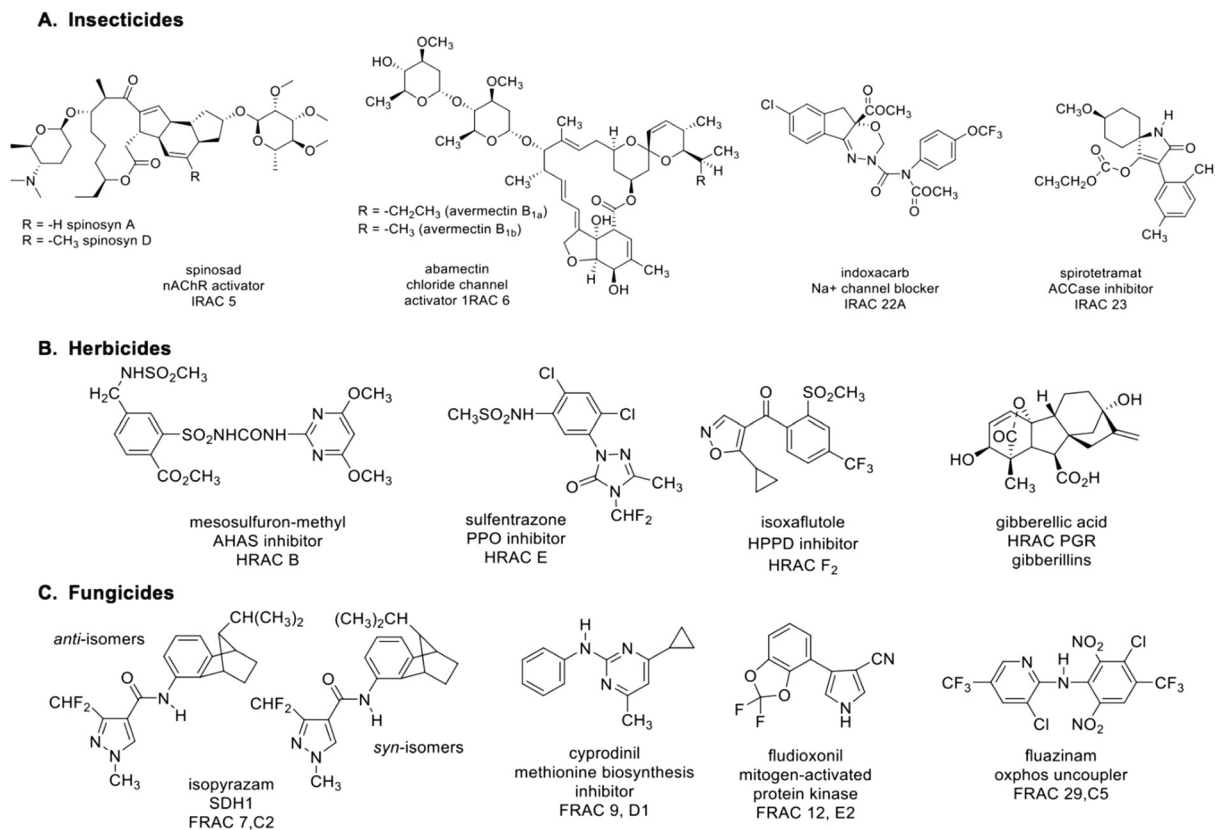

Fig. 4 Other major insecticides, herbicides, and fungicides in 2015 annual sales but not amounts and their target and resistance classifications.

**Table 5** Four nematicides and a molluscicide and their 2015 annual amounts and sales relative to the top 30 pesticides and 2016 PAN international hazard ratings

| No. in top 30 pesticides <sup>a</sup> | Name and IRAC/HRAC class.           | Annual millions |               | Hazard ratings <sup>b</sup> |                          |
|---------------------------------------|-------------------------------------|-----------------|---------------|-----------------------------|--------------------------|
|                                       |                                     | Amount (m/t)    | Sales (\$ mn) | Mammal <sup>c</sup>         | Environment <sup>d</sup> |
| 5                                     | 1,3-Dichloropropene                 | 87 000          | 286           | 0/1                         | 0/0/0/0                  |
| 9                                     | Metam (HRAC Z) <sup>e</sup>         | 52 500          | 109           | 0/1                         | 0/0/0/0                  |
| 13                                    | Chloropicrin (IRAC 8B) <sup>e</sup> | 32 000          | 261           | 1/0                         | 0/0/0/0                  |
| 18                                    | Dazomet (HRAC Z) <sup>e</sup>       | 21 350          | 181           | —                           | —                        |
| 26                                    | Metaldehyde                         | 13 965          | 281           | —                           | —                        |

<sup>a</sup> Rankings 1–30 relative to the top 30 pesticides from most to least in annual amounts. <sup>b</sup> Ratings from PAN international list of highly hazardous pesticides (12/2016) as highly hazardous (1) or not (0). Blanks indicate not rated. <sup>c</sup> Acute toxicity/chronic or long term effects (carcinogen, mutagen and reproductive). <sup>d</sup> Sequentially bees/aqueous organisms/persistence/bioaccumulation. <sup>e</sup> Amounts, sales and hazard ratings are given for other insecticides in Table 2 and herbicides in Table 3.

## 8. Concluding comments

The selection of resistant strains is the driving force in pesticide evolution. The need for replacement pesticides to maintain pest control on the “pesticide treadmill” guarantees a major market for any new highly effective, safe, and moderate cost discovery. The compounds are generally increasingly complex (*e.g.* more fluorine atoms per molecule) and potent (to reduce the dose and increase the selectivity). Pesticide research is remarkably effective in finding new chemical pathways and coupled systems due to the variety of systems and organisms tested with designed or random libraries of compounds.

This review considers only certain areas of pesticide toxicology research with emphasis on the following three aspects. First, it is based on current high volume pesticides. Other highly effective pesticides may not reach the high volume because of potency or high cost as illustrated by 13 compounds in Fig. 4. Two of the four insecticides are modified or reconstructed natural products to achieve higher stability and potency. Others are relatively new compounds with an expanding market. Second, it is restricted to synthetic organics and does not consider RNA/DNA modifiers. The use of omic technologies will continue to facilitate mechanism studies and expanding knowledge in comparative biochemistry and biophysics will help create selective compounds. Third, it recognizes the importance of Bt as a biological agent but does not consider GMOs, which are a major factor in the dominance of glyphosate as a broad-spectrum herbicide used on multiple genetically engineered herbicide-resistant crops.

The competition of pests and people for food, fiber, environmental niches, and health will continue to provide a role for pesticide toxicology to establish and insure a firm scientific base for developments. Creative approaches and careful applications will assure effective pest control essential for human and environmental health.

In summary, pesticide toxicology research involves inventors, developers, and regulators considering amounts, biology, and chemistry with the common goal of creating and maintaining safe and effective pesticides. The potency should be

high so only small amounts are used. The molecular target or mode of action should allow high selectivity for pests *versus* nontarget species and with little or no cross-resistance with other compounds. The chemical must be adequately stable to control the pest yet biodegradable so that there are little or no food residues or environmental contaminants. These relationships must be thoroughly evaluated for each compound and the results made available for everyone to evaluate and judge the degree of safety. Therein lies the challenges and multidisciplinary adventures of pesticide toxicology research.

## Abbreviations

|                |                                             |
|----------------|---------------------------------------------|
| 2,4,5-T        | 2,4,5-Trichlorophenoxyacetic acid           |
| 2,4-D          | 2,4-Dichlorophenoxyacetic acid              |
| ABCs           | Amounts, biology, chemistry                 |
| AChE           | Acetylcholinesterase                        |
| Bt             | <i>Bacillus thuringiensis</i>               |
| CYPs           | Cytochromes P450                            |
| EPA            | Environmental protection agency             |
| EPSPS          | 5-Enolpyruvylshikimate-3-phosphate synthase |
| FRAC           | Fungicide resistance action committee       |
| GMO            | Genetically modified organism               |
| GSH            | Glutathione                                 |
| GSTs           | Glutathione S-transferases                  |
| HPPD           | 4-Hydroxyphenylpyruvate dioxygenase         |
| HRAC           | Herbicide resistance action committee       |
| IRAC           | Insecticide resistance action committee     |
| kdr            | Site for cross-resistance of pyrs           |
| MCPA           | 2-Methyl-4-chlorophenoxyacetic acid         |
| MCs            | Methylcarbamates                            |
| nAChR          | Nicotinic acetylcholine receptor            |
| Neonics        | Neonicotinoids                              |
| OPs            | Organophosphates                            |
| PAN            | Pesticide action network                    |
| PS II          | Photosystem II                              |
| Pyrs           | Pyrethroids                                 |
| Q <sub>o</sub> | Plastoquinol binding site of PS II          |
| VLCFA          | Very long chain fatty acid                  |
| α-deMe         | 14α-Demethylase                             |



## Author contributions

The data for pesticide amounts and sales were complied by Robert Bryant and the remaining portion was written by John Casida.

## Conflicts of interest

There are no conflicts of interest to declare.

## Acknowledgements

Special thanks are given to Minhchau (MC) Le Nguyen (B.S. 2017, Department of Nutritional Sciences and Toxicology: Physiology and Metabolism at the University of California, Berkeley), Ilsa Zhang (B.S. 2017, Department of Nutritional Sciences and Toxicology; Molecular Toxicology at the University of California, Berkeley), and Thomas Zy Lin (Department of Molecular and Cell Biology at the University of California, Berkeley), who assisted with devotion and distinction in searching, compiling, and presenting the information in this Review.

## References

- 1 J. E. Casida, Pest toxicology: the primary mechanisms of pesticide action, *Chem. Res. Toxicol.*, 2009, **22**, 609–619.
- 2 J. E. Casida and K. A. Durkin, Neuroactive insecticides: targets, selectivity, resistance, and secondary effects, *Annu. Rev. Entomol.*, 2013, **58**, 99–117.
- 3 J. E. Casida and K. A. Durkin, Pesticide chemical research in toxicology: lessons from nature, *Chem. Res. Toxicol.*, 2017, **30**, 94–104.
- 4 J. E. Casida, Why prodrugs and propesticides succeed, *Chem. Res. Toxicol.*, 2017, **30**, 1117–1126.
- 5 J. E. Casida, Pesticide interactions: mechanisms, benefits, and risks, *J. Agric. Food Chem.*, 2017, **65**, 4553–4561.
- 6 Agranova Alliance, Crop Protection Archives. [online]. Available: <http://www.agranova.co.uk> (accessed April 7, 2017).
- 7 Insecticide Resistance Action Committee, *IRAC mode of action classification scheme*, CropLife International, 2017.
- 8 Herbicide Resistance Action Committee, The World of Herbicides According to HRAC Classification on Mode of Action 2010, in Heap, I. The International Survey of Herbicide Resistant Weeds. Online. Internet. March 28 2017 available at <http://www.weedscience.com>.
- 9 Fungicide Resistance Action Committee, *FRAC code list@: fungicides sorted by mode of action (including FRAC code numbering)*, CropLife International, Brussels, Belgium, 2017.
- 10 Pesticide Action Network International, *PAN International list of highly hazardous pesticides*, 2016.
- 11 *Hayes' Handbook of Pesticide Toxicology*, ed. R. Krieger, 3rd edn, 2010, 2342pp.
- 12 *The Pesticide Manual: A World Compendium*, ed. J. A. Turner, 17th edn, 2015, 1357pp.
- 13 J. E. Casida, Golden age of RyR and GABA-R diamide and isoxazoline insecticides: common genesis, serendipity, surprises, selectivity, and safety, *Chem. Res. Toxicol.*, 2015, **28**, 560–566.
